# Supplementary material for: Arctic sea ice simulation in the PlioMIP ensemble
Source: Copernicus journal article supplement (doi:10.5194/cp-12-749-2016), 2016-03-23
Supplement: Supplementary file 1 [file cp-12-749-2016-supplement.pdf]

Supplement of *Clim. Past*, 12, 749–767, 2016  
<http://www.clim-past.net/12/749/2016/>  
doi:10.5194/cp-12-749-2016-supplement  
© Author(s) 2016. CC Attribution 3.0 License.

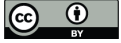

*Supplement of*

## **Arctic sea ice simulation in the PlioMIP ensemble**

**Fergus W. Howell et al.**

*Correspondence to:* Fergus W. Howell (eefwh@leeds.ac.uk)

The copyright of individual parts of the supplement might differ from the CC-BY 3.0 licence.

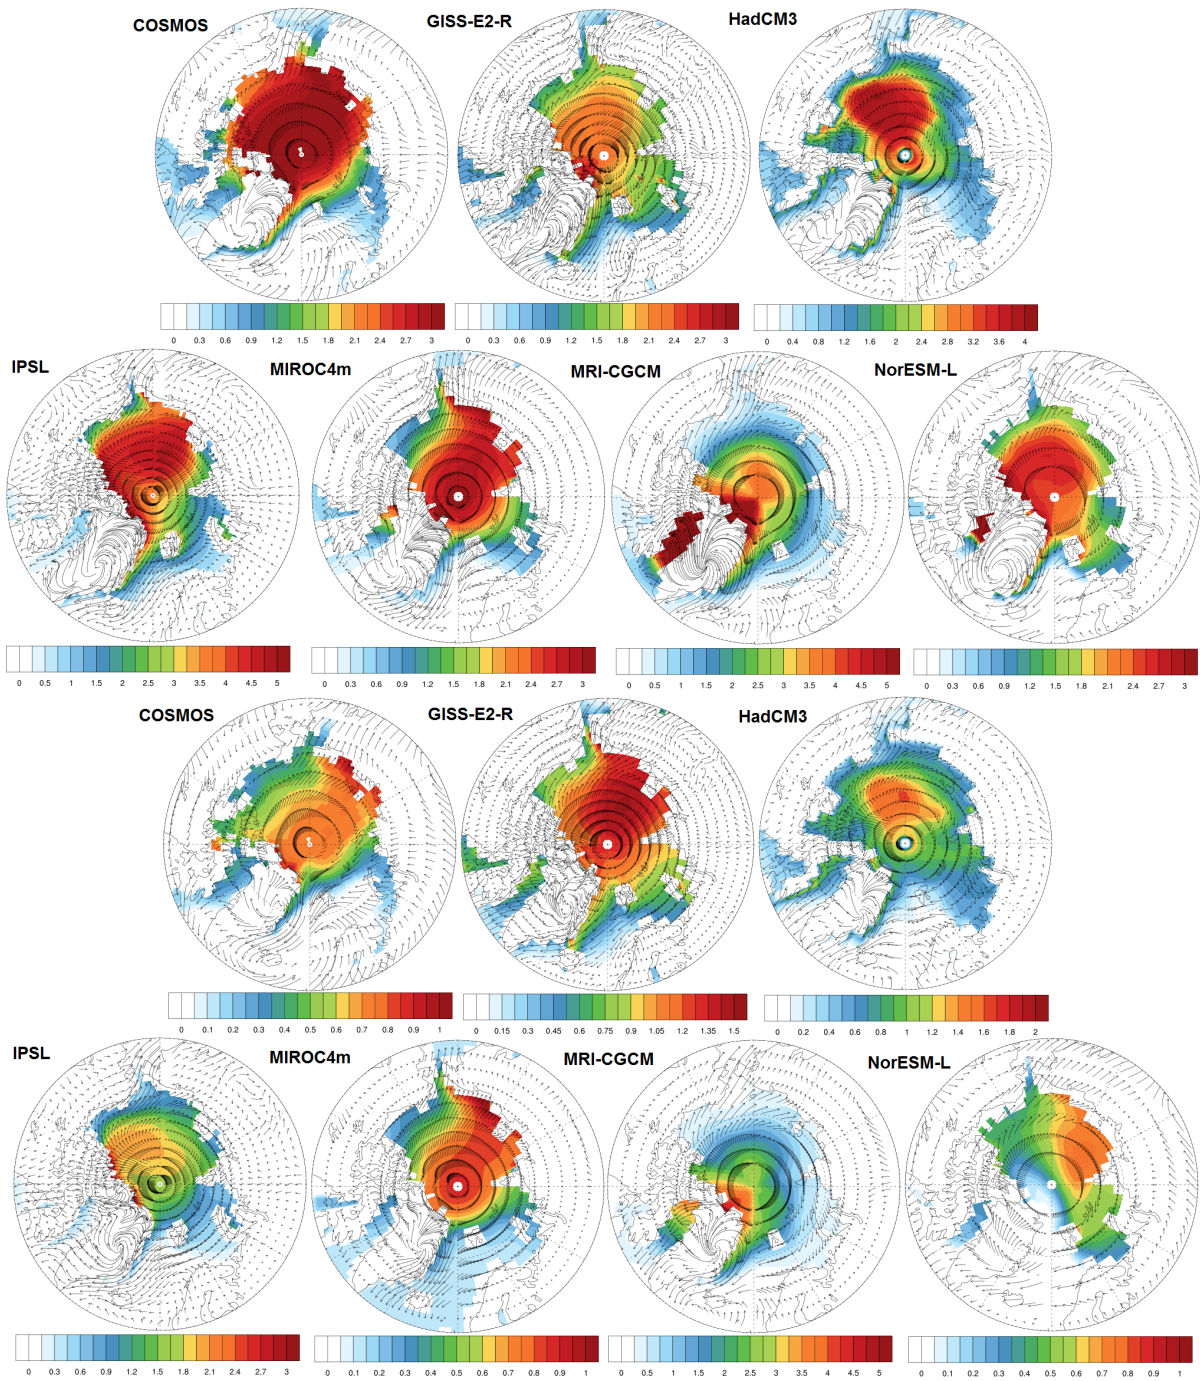

**Figure 1.** Mean annual 10 m winds and mean annual sea ice thickness (m) in pre-industrial (upper half) and mid-Pliocene (lower half) for each PlioMIP Experiment 2 model (excluding CCSM4). Vector length is proportional to wind speed.

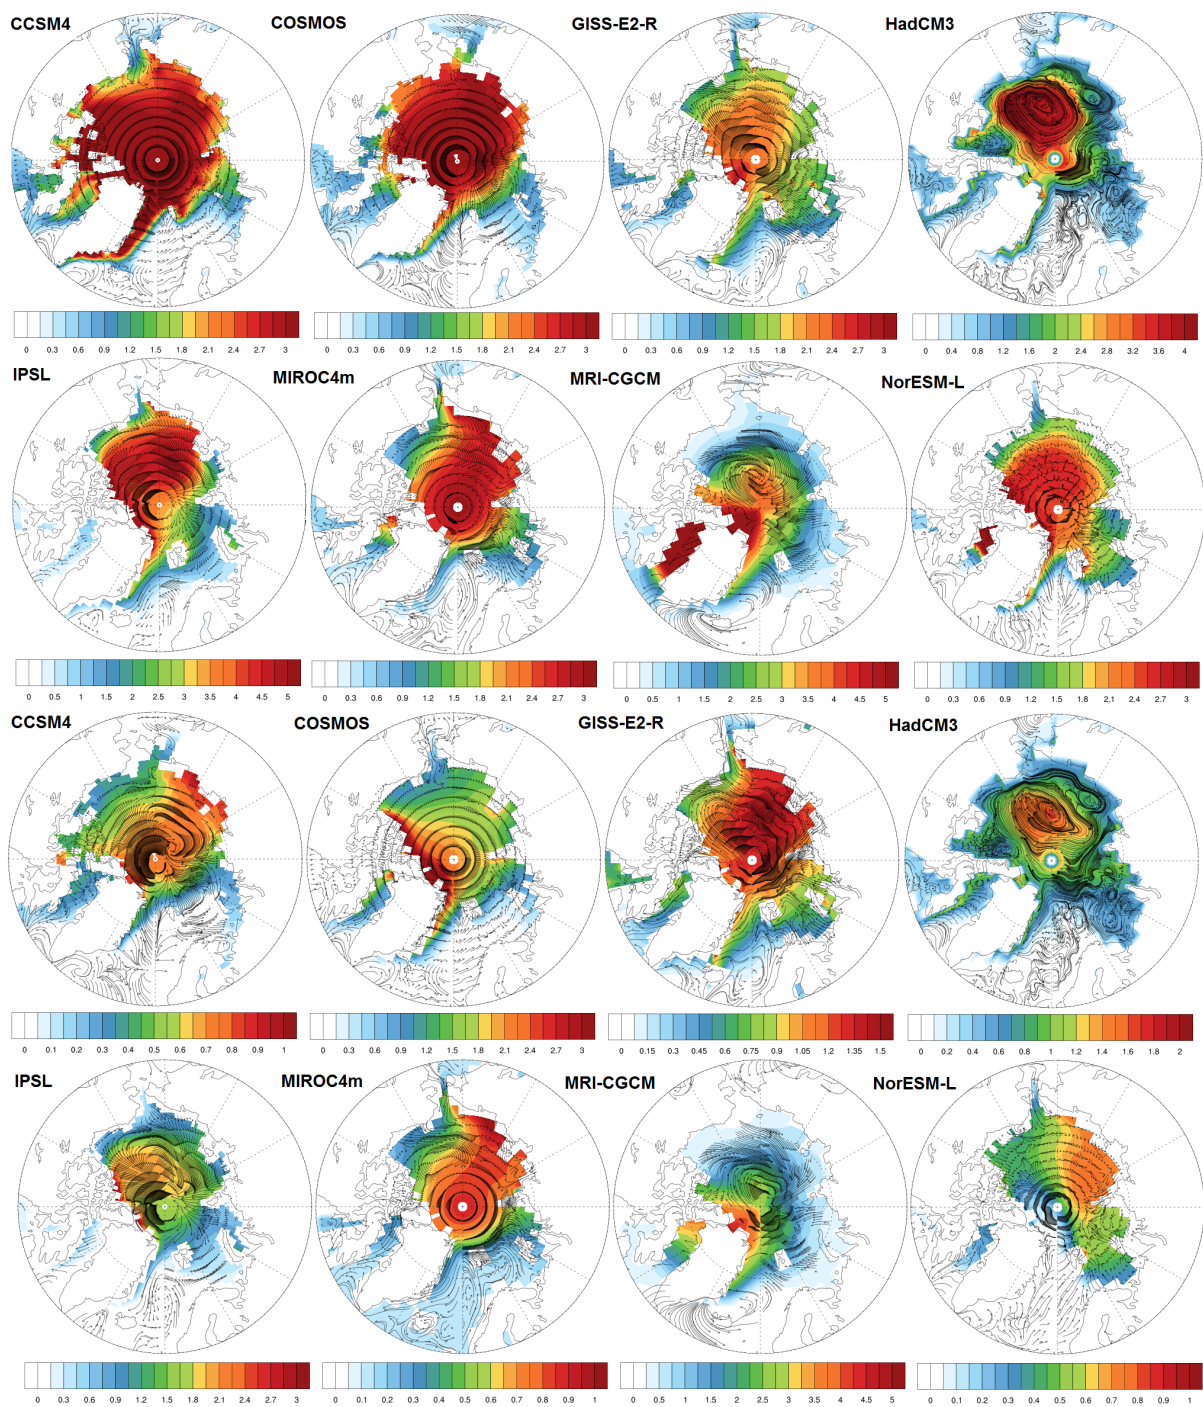

**Figure 2.** Mean annual surface ocean currents and sea ice thicknesses (m) in pre-industrial (upper half) and mid-Pliocene (lower half) for each PlioMIP Experiment 2 model. Vector length is proportional to ocean current speed.
